# Supplementary material for: 3D-PAD: Paper-Based Analytical Devices with Integrated Three-Dimensional Features
Source: Biosensors (Basel). 2021 Mar 17;11(3):84. doi: 10.3390/bios11030084 (PMC8002416; doi:10.3390/bios11030084)
Supplement: Supplementary file 1 [file biosensors-11-00084-s001.pdf]

# 3D-PAD: Paper-Based Analytical Devices with Integrated Three-Dimensional Features

James S. Ng<sup>1</sup> and Michinao Hashimoto<sup>1,2,3,\*</sup>

<sup>1</sup> Pillar of Engineering Product Development, Singapore University of Technology and Design, 8 Somapah Road, Singapore 487372, Singapore; james\_ng@mymail.sutd.edu.sg

<sup>2</sup> SUTD-MIT International Design Centre, Singapore University of Technology and Design, 8 Somapah Road, Singapore 487372, Singapore

<sup>3</sup> Digital Manufacturing and Design Centre, Singapore University of Technology and Design, 8 Somapah Road, Singapore 487372, Singapore

\* Correspondence: hashimoto@sutd.edu.sg; Tel.: +65-6499-4867

## Supplementary

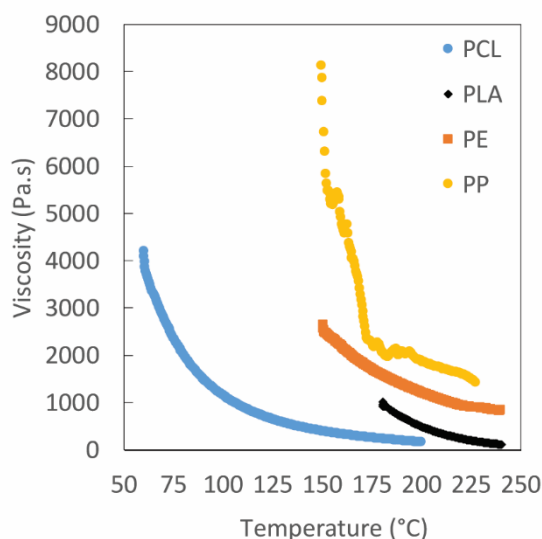

**Figure S1.** Plot showing the viscosities of four FDM-printable polymers—poly(caprolactone) (PCL), poly(lactic acid) (PLA), poly(ethylene) (PE), poly(propylene) (PP)—with respect to the temperature.
